# Supplementary material
Source: Springer Nature journal article supplement (https://www.springermedizin.de/resource/supplementary/12913_2012_2745_MOESM1_ESM.pdf/9531342)

## Organizational Design

Intra-Organizational  
Mechanisms

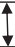

Inter-Organizational  
Mechanisms

- Structure
- Knowledge and technology
- Administrative operational processes
- Task characteristics

## Networks

Intra-Organizational  
Networks

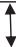

Inter-Organizational  
Networks:  
Relational coordination

- Exchange of information
- Goals
- Roles
- Quality of relationships

## Outcomes

- Quality
- Efficiency Performance

- Need for coordination

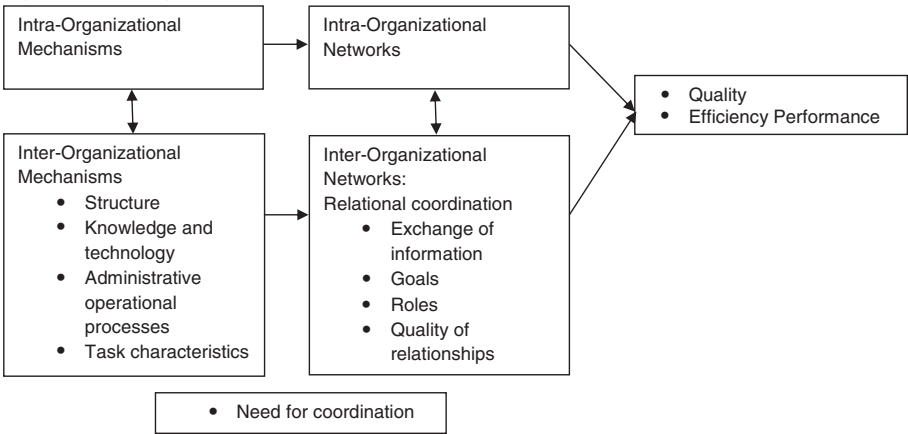

Supplement: MOESM1 [file 9531342]
